# Supplementary material
Source: PubMed Central journal article supplement (PMC10026518)
Supplement: NIHMS1860944-supplement-1.pdf [file NIHMS1860944-supplement-1.pdf]

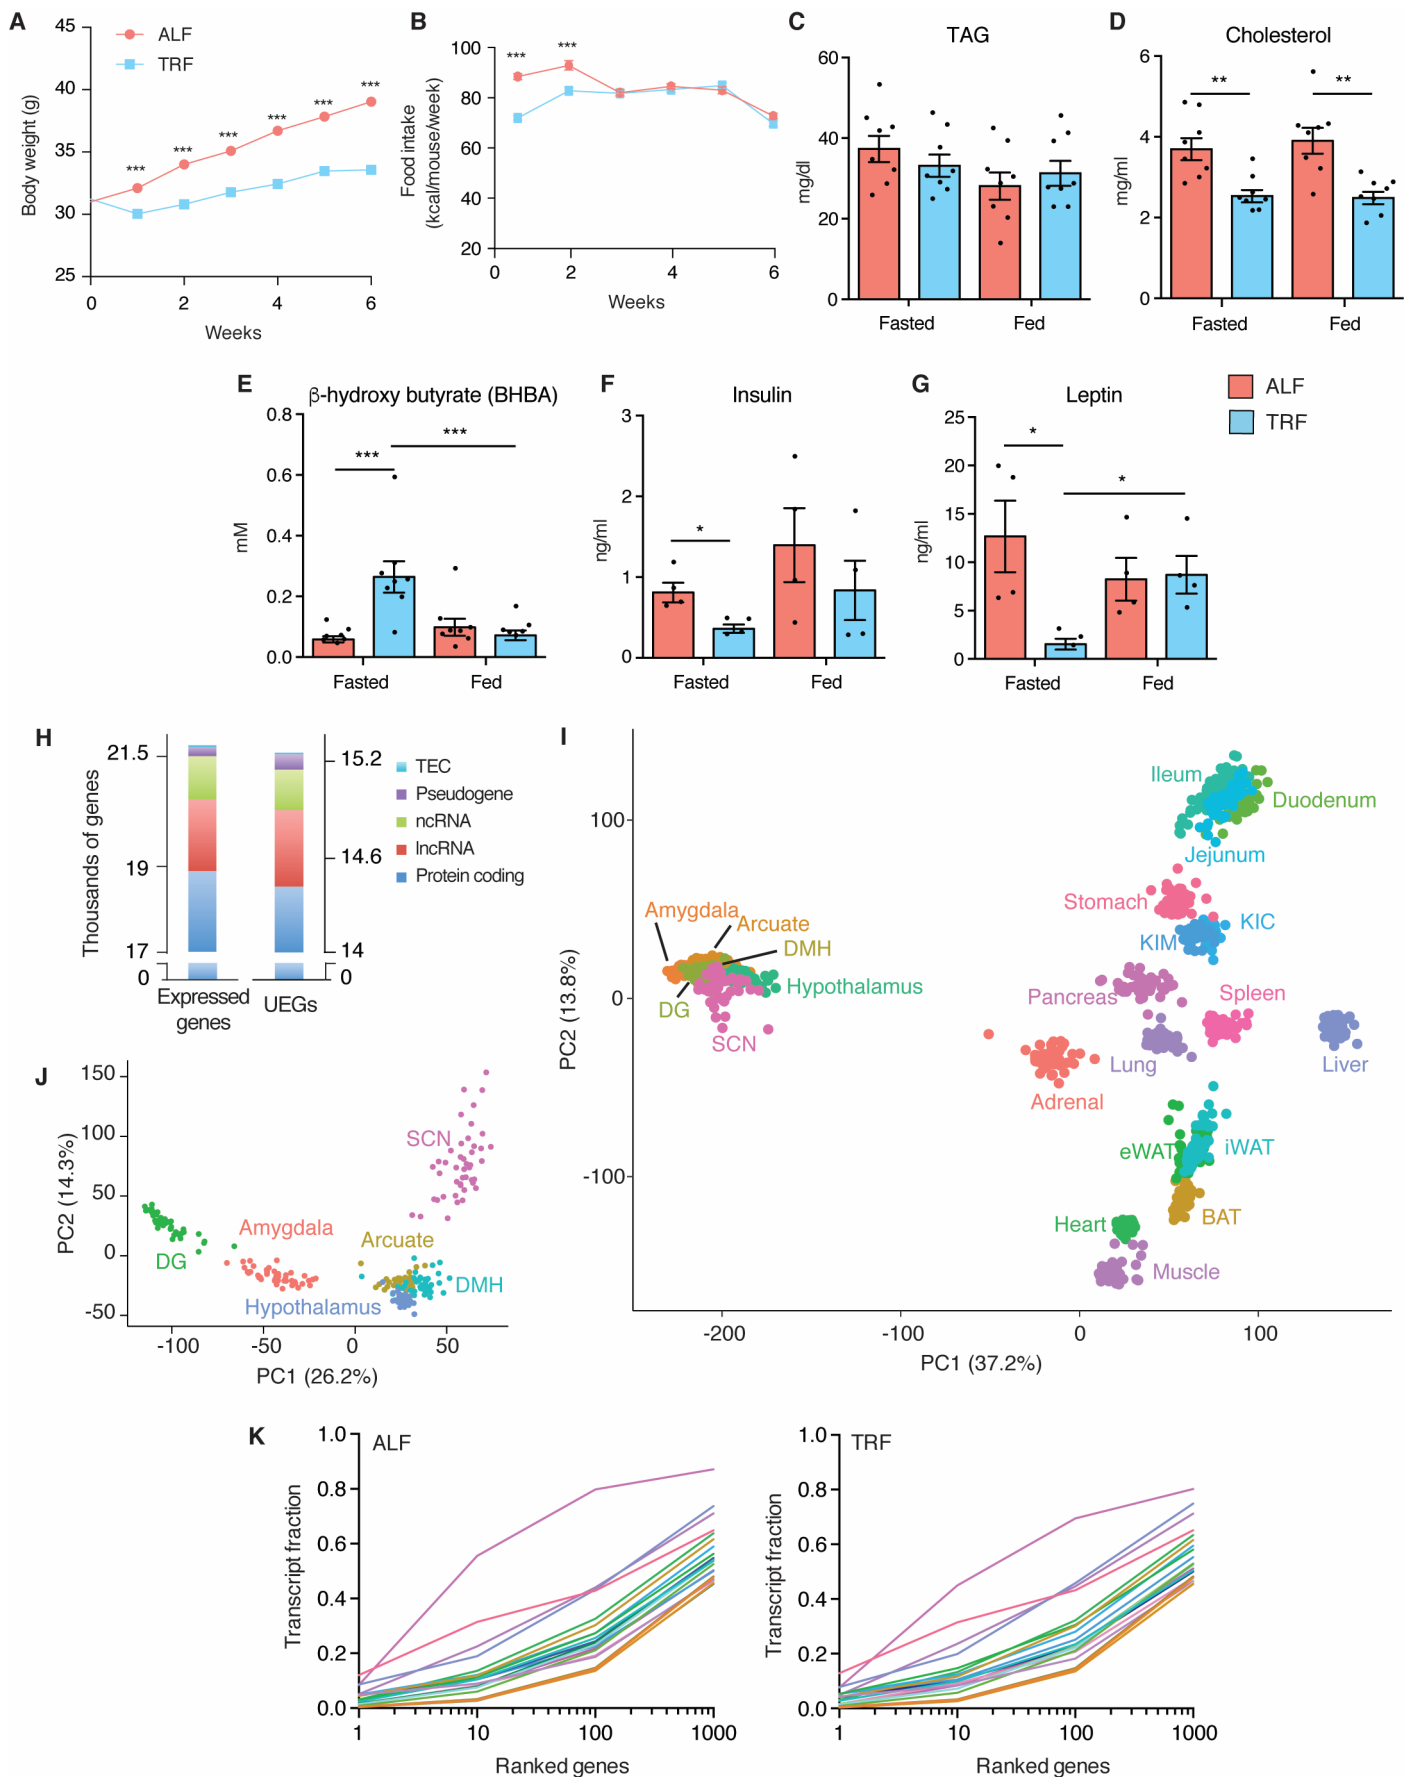

**Supplementary figure 1. Effect of short term TRF on physiology and gene expression. Related to Figure 1.** (A, B) Evolution of (A) Body weight and (B) Weekly food consumption during the TRF intervention period is shown. (C-G) Serum analysis of the indicated metabolites (C-E) and hormones (F, G) in the subjective fasted (ZT10-ZT12) and fed (ZT18-ZT20) phases in ALF or TRF paradigm. (H) Number of genes expressed in at least one of the 22 tissues

(21,791, left) or present in all the tissues sampled – Ubiquitously expressed genes (UEG) (15,253, right). (I) Principal component analysis performed on the 12 time points of ALF and TRF samples from 22 tissues shows clustering of similar tissues based on gene expression profiles. The 6 brain tissues are clustered very tightly apart from the peripheral organs. (J) Principal component analysis performed on the 12 time points of ALF and TRF samples from 6 brain tissues shows clustering of similar region tissues Arcuate, DMH and hypothalamus, while Amygdala, DG and SCN cluster separately. (K) Cumulative distribution of the average fraction of total transcriptome contributed by genes when sorted from most to least expressed in each tissue (x-axis). Each tissue is color-coded as represented in (I).

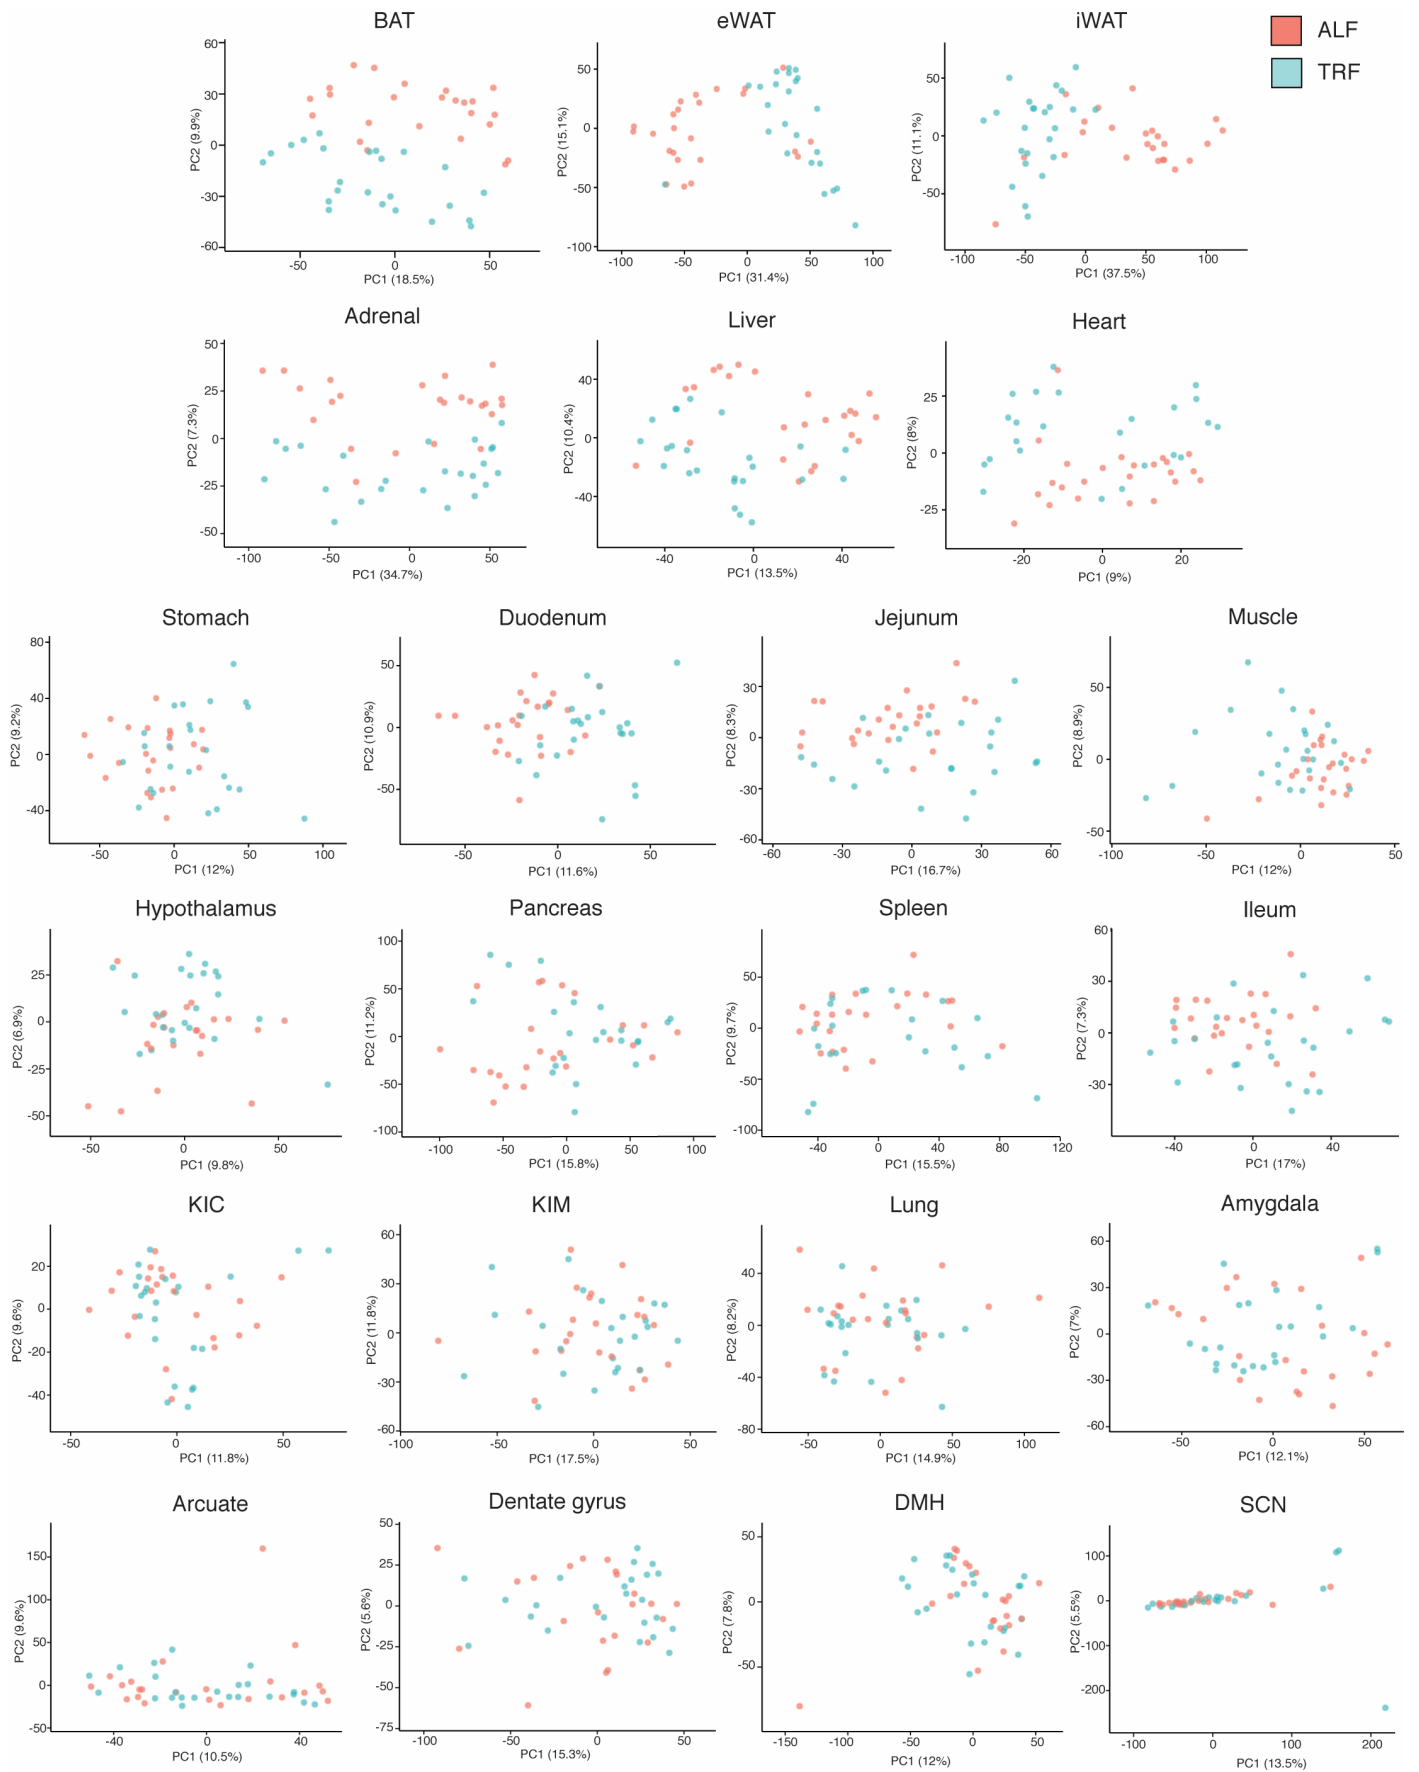

**Supplementary figure 2. TRF leads to a tissue-specific transcriptional response. Related to Figures 1 and 2.**

Principal component analysis performed on the 12 time points of indicated 22 tissues shows tissue specific clustering or separation of ALF and TRF samples.

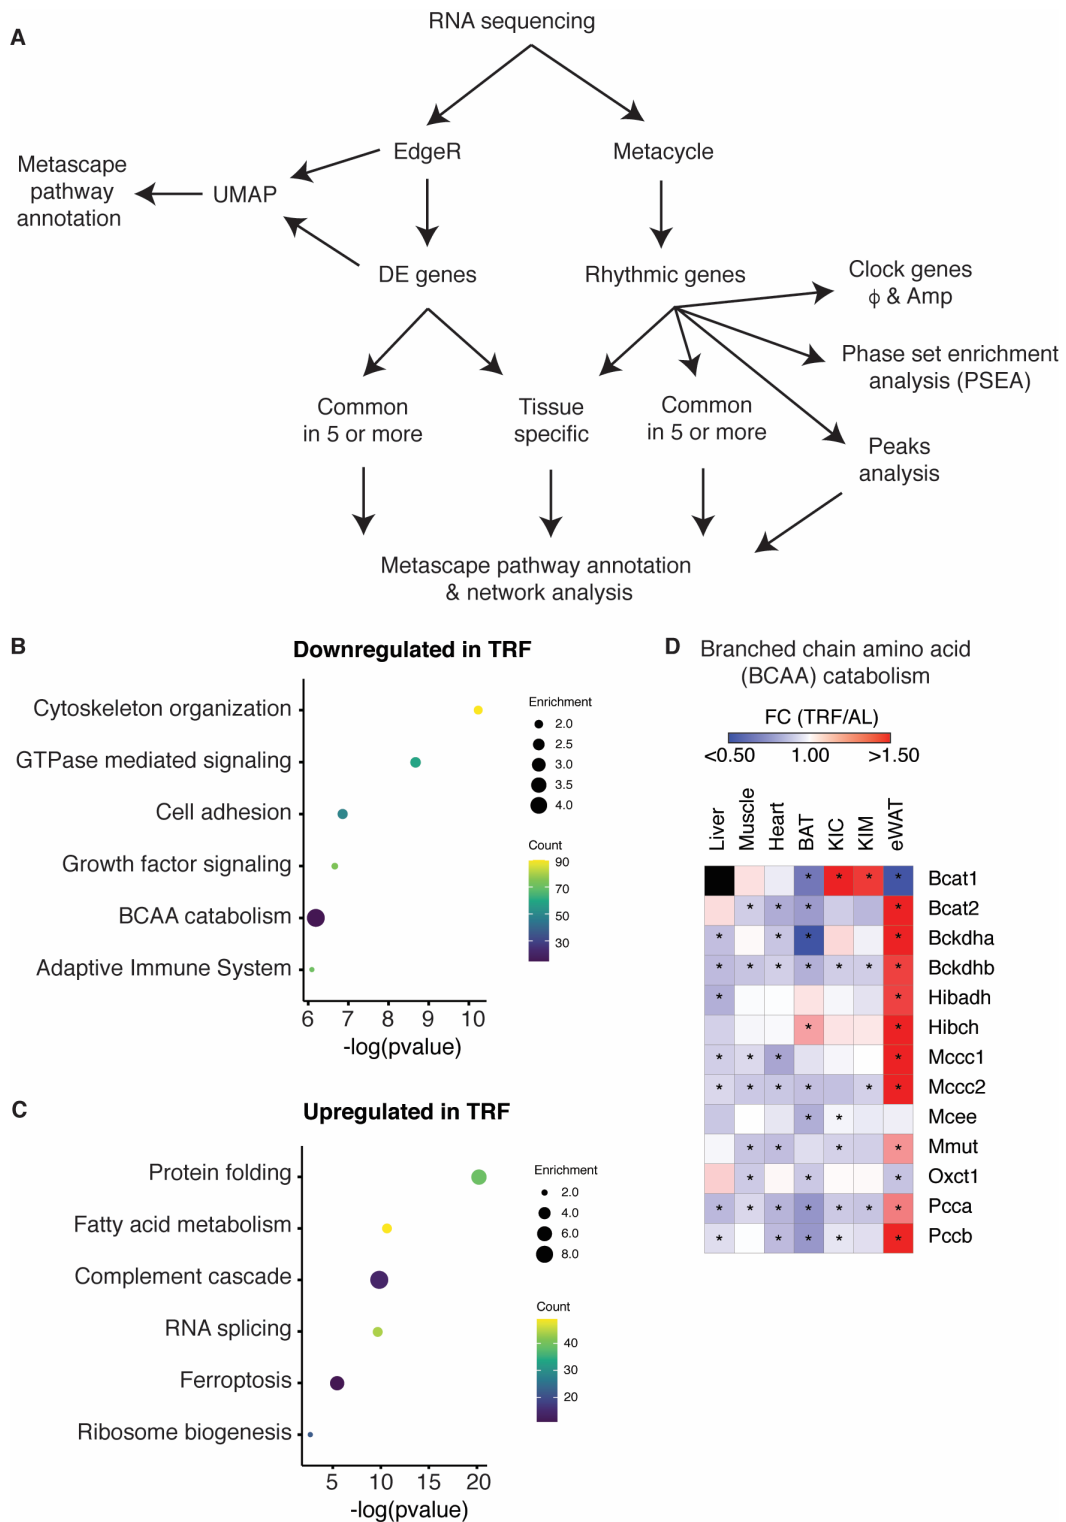

**Supplementary figure 3. TRF leads to both tissue-specific and multi-tissue responses. Related to Figure 2.** (A) Flow chart depicting the different analyses performed in this article. (B, C) Overrepresentation analysis using KEGG pathway and GO BP for common differentially expressed genes in 5 or more tissues that are (B) Downregulated in TRF or (C) Upregulated in TRF. (D) Heatmap of fold change (FC-TRF/AL) in expression of genes involved in branched chain amino acid (BCAA) catabolism in the indicated tissues. Genes not detected in a particular tissue are indicated in black.

Statistics: \* indicates  $P < 0.05$  using multiple t-test comparison.

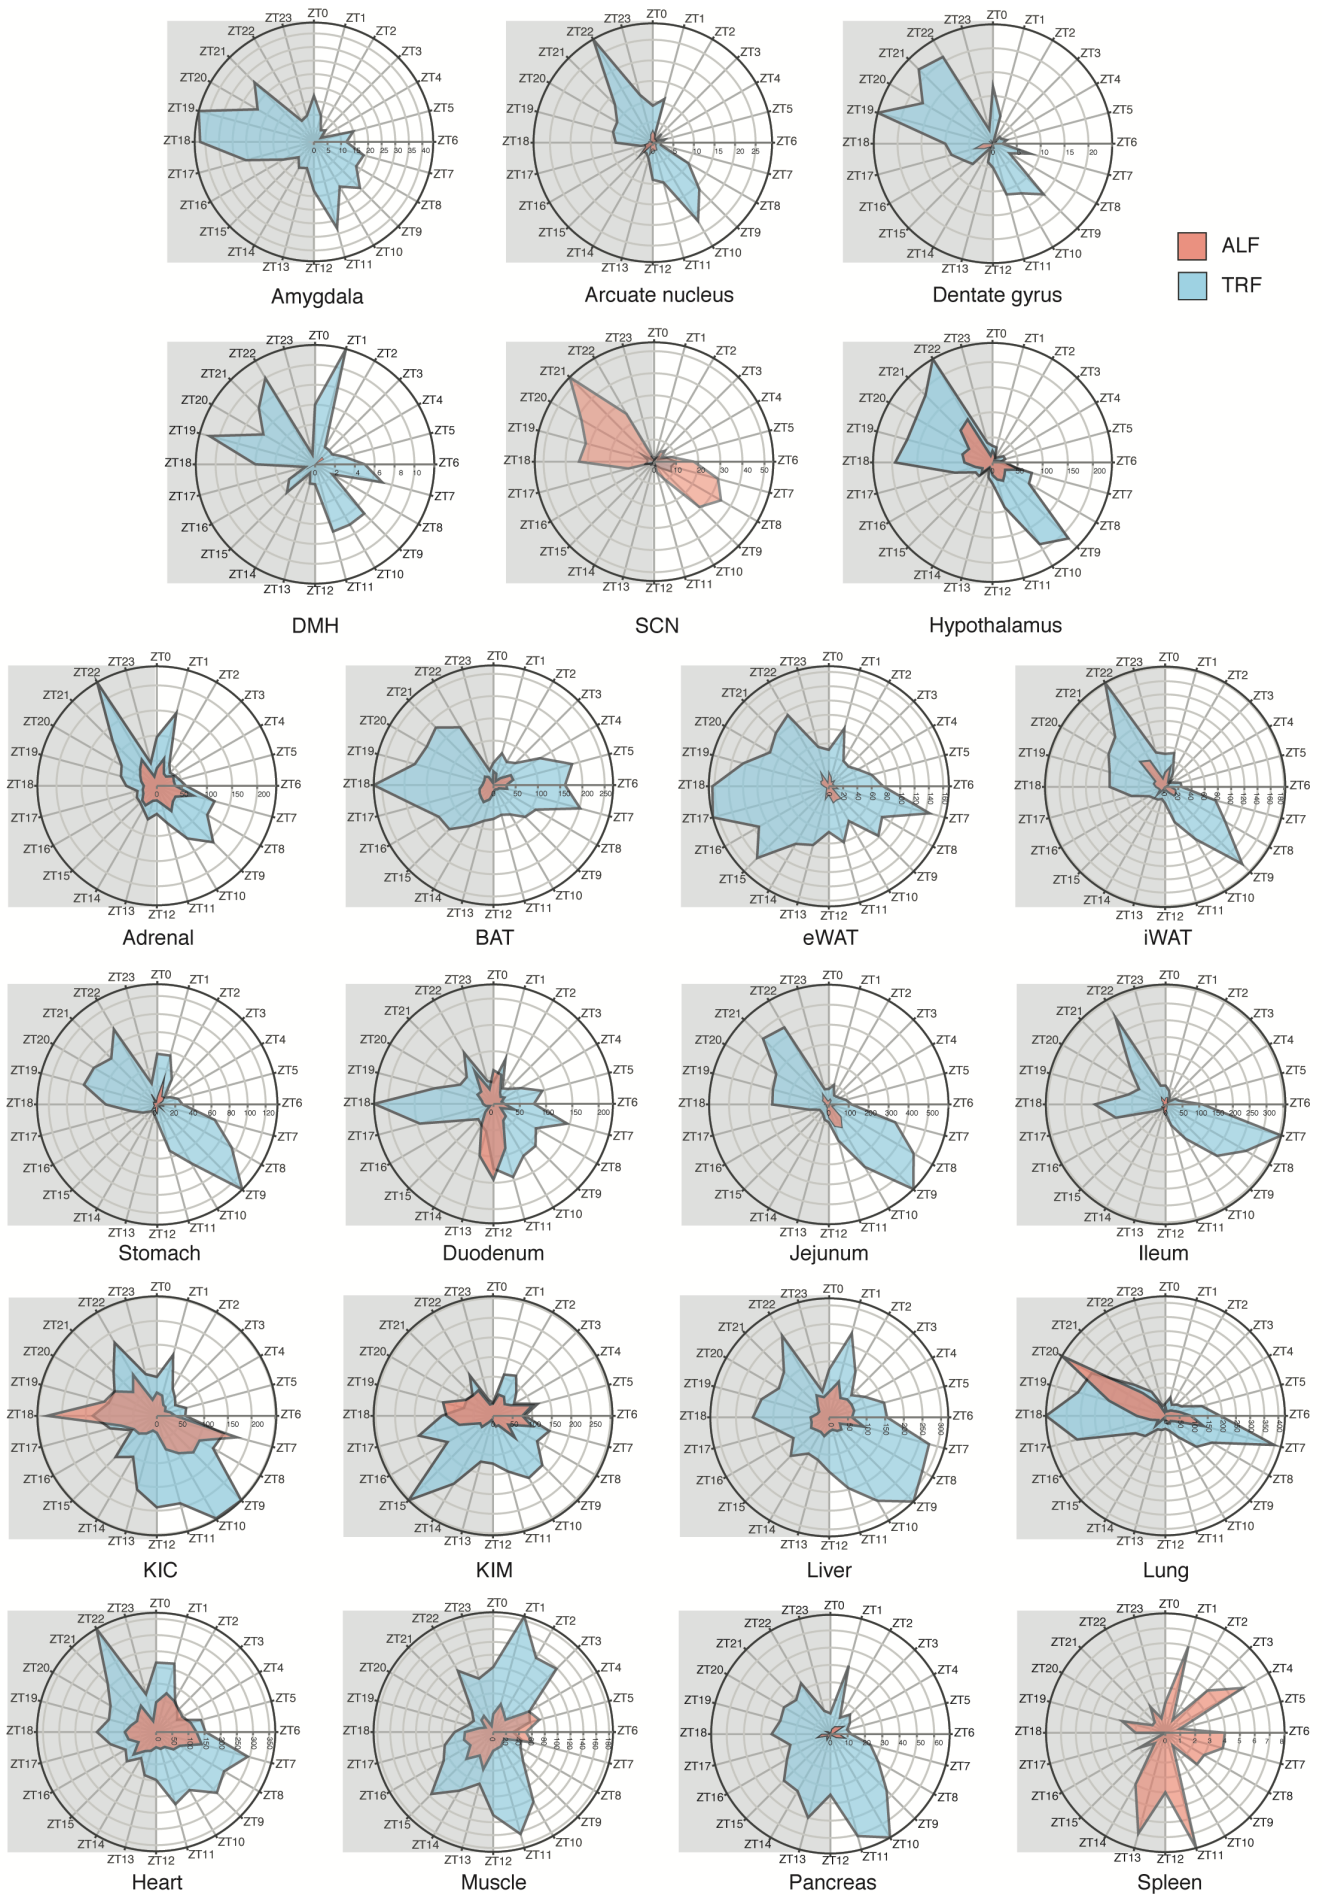

**Supplementary figure 4. Phase plots for all rhythmic genes in ALF and TRF in each tissue. Related to Figure 3.**

Radial plots of the distribution of peak phases of expression of significant cycling genes in ALF or TRF paradigm in each tissue. Gray indicates dark phase (ZT12-ZT24/ZT0), and the number of cycling genes are listed in black.

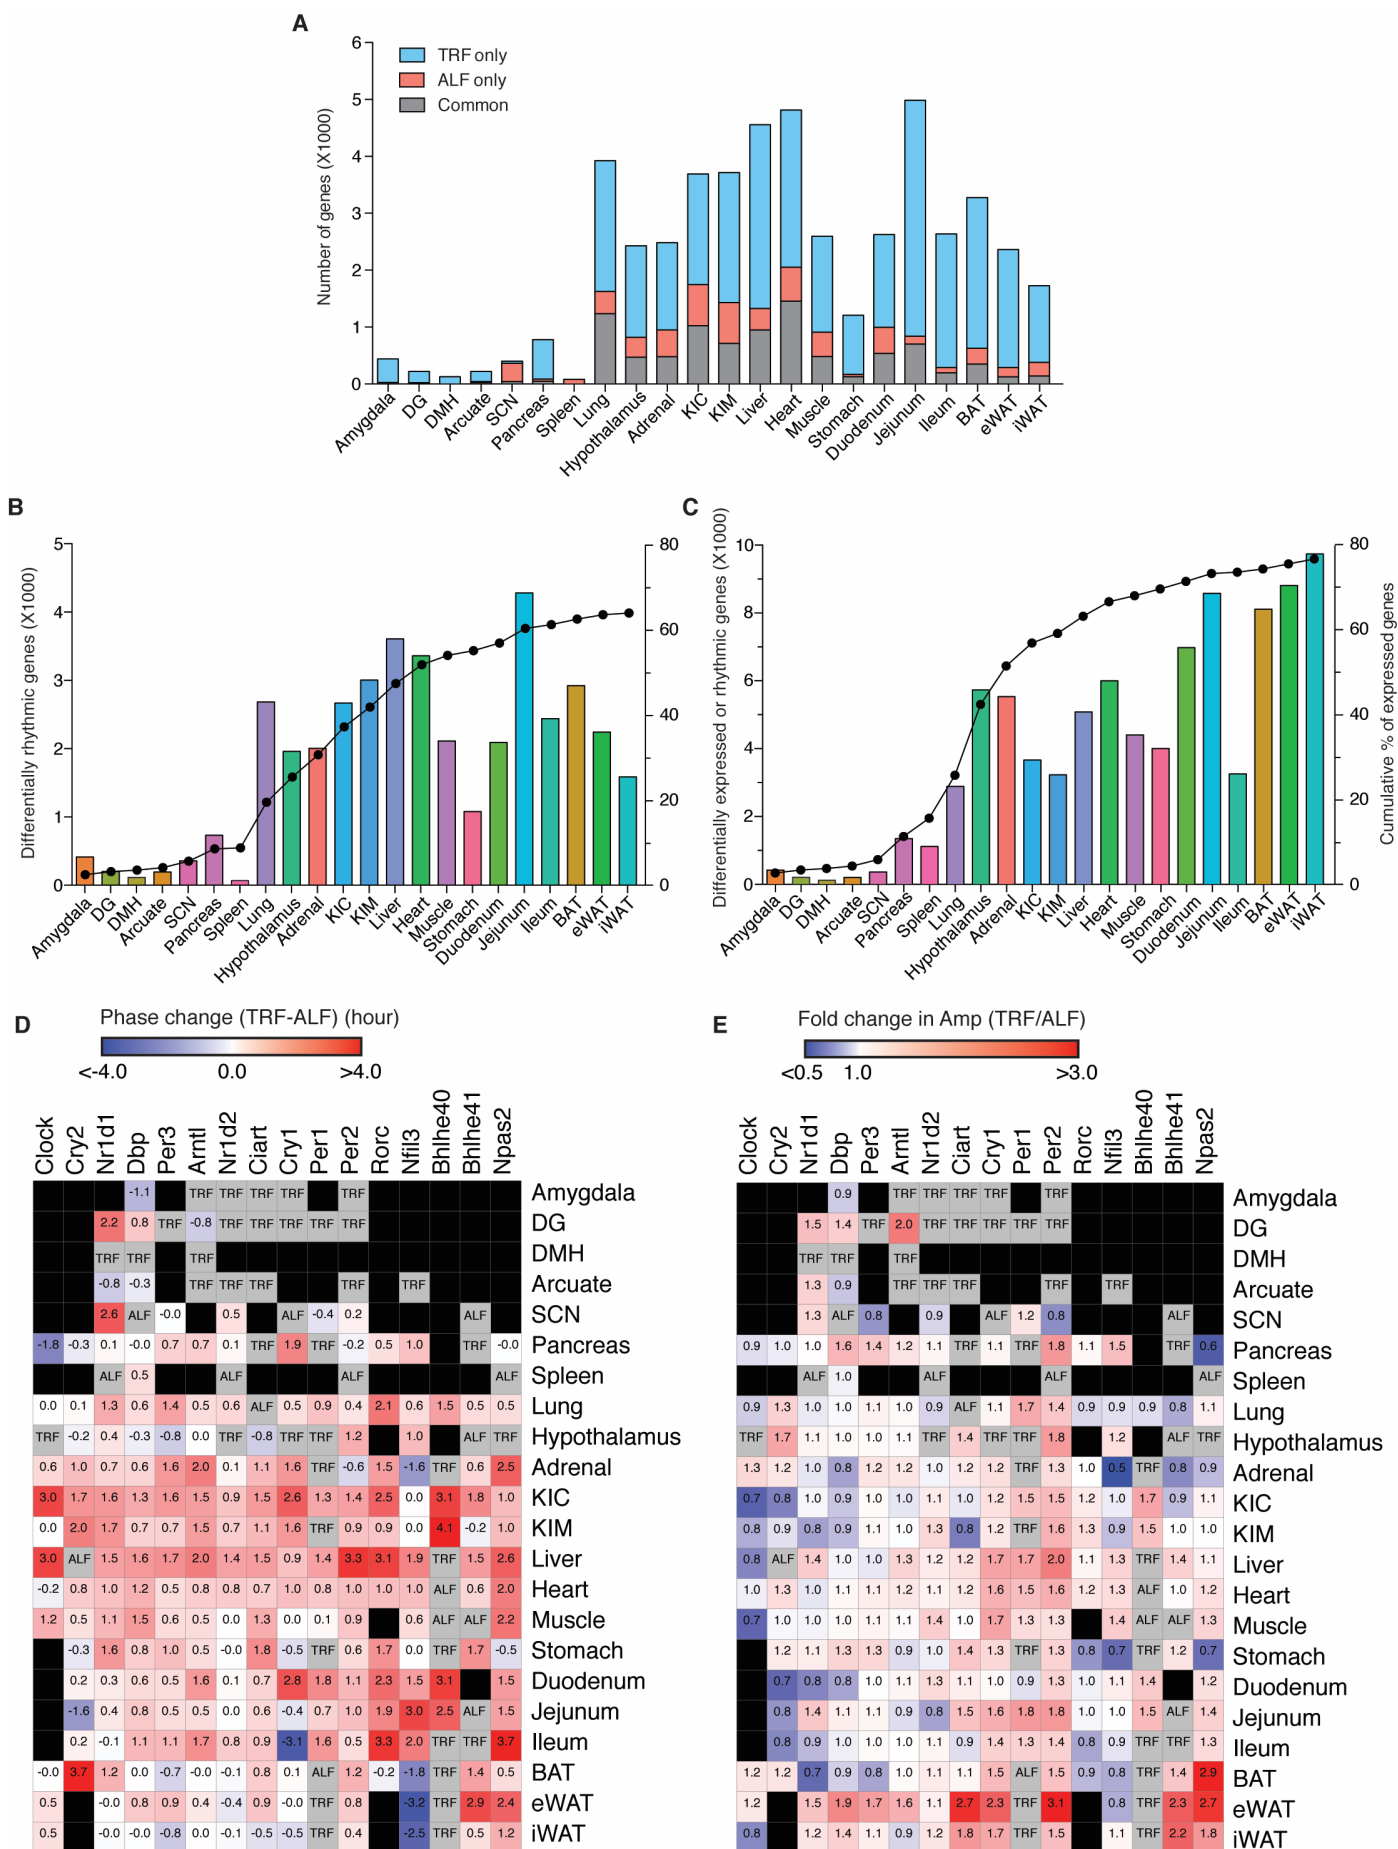

**Supplementary figure 5. TRF leads to tissue-specific changes in rhythmic genes. Related to Figures 4 and 6. (A)** Stacked bar plot indicating the number of common rhythmic genes, genes rhythmic only in ALF condition and genes rhythmic only in TRF condition in each tissue. **(B)** Number of differentially rhythmic (DR) genes per tissue (bar) and

their cumulative contribution to the total percent of DR genes (line). (C) Number of differentially expressed (DE) or differentially rhythmic (DR) genes per tissue (bar) and their cumulative contribution to the total percent of DE+DR genes (line). (D) Phase change (TRF-AL) in the peak phase of expression (in hour) of clock genes in the tissues where they are detected as cycling in ALF and TRF. Genes detected as cycling in only ALF or TRF are indicated in grey and genes not detected as significantly cycling in a particular tissue are indicated in black. Positive phase change indicates phase delay and negative phase change indicates phase advance under TRF. (E) Fold change (FC-TRF/AL) in the amplitudes of clock genes in the tissues where they are detected as cycling in ALF and TRF. Genes detected as cycling in only ALF or TRF are indicated in grey and genes not detected as significantly cycling in a particular tissue are indicated in black.



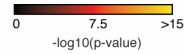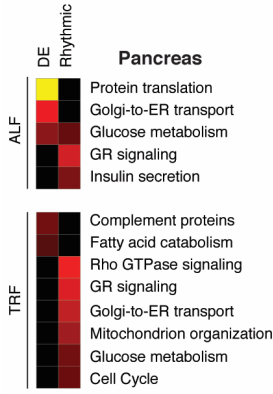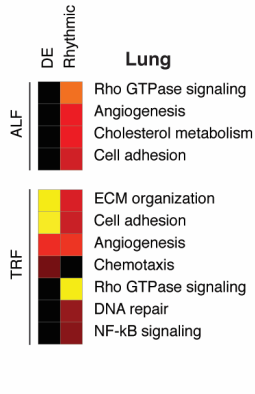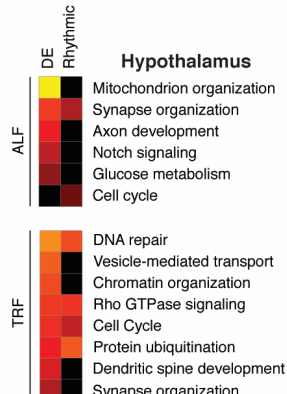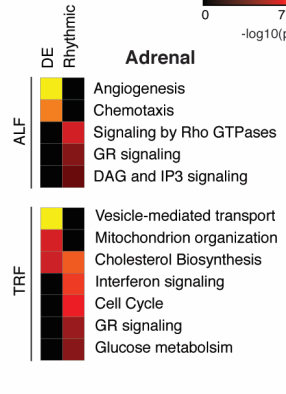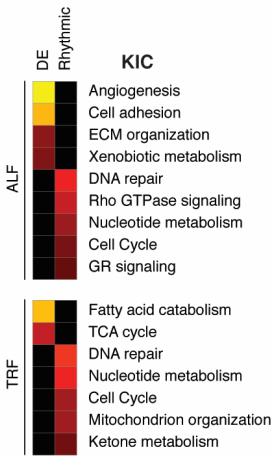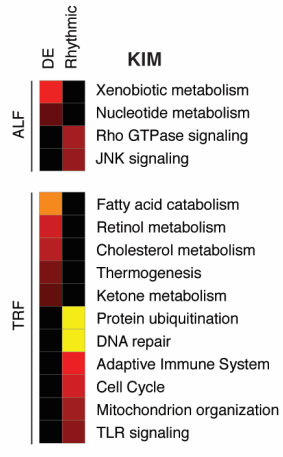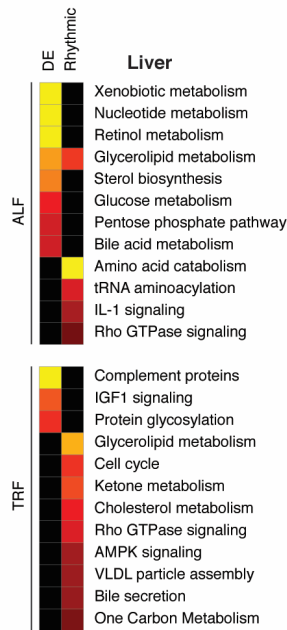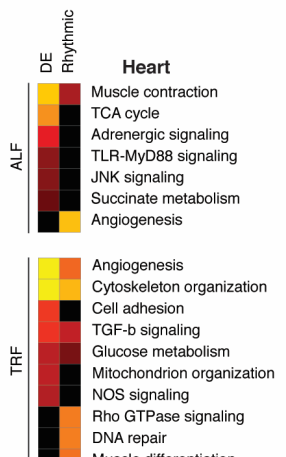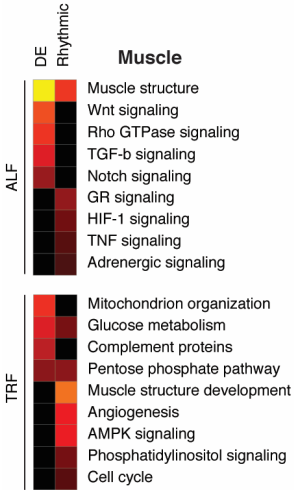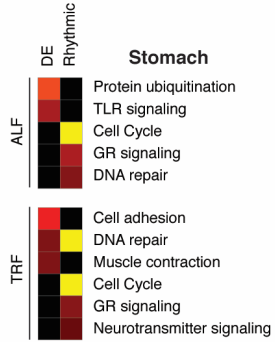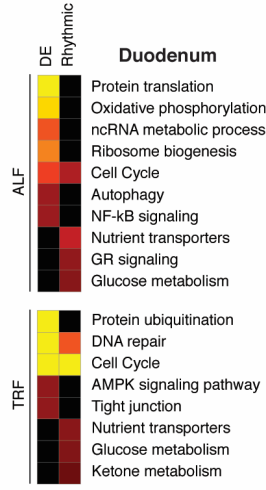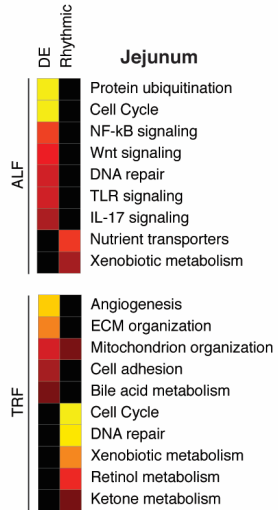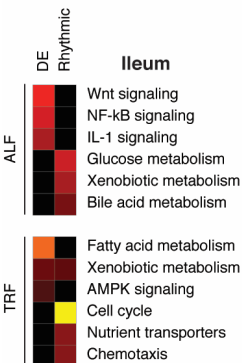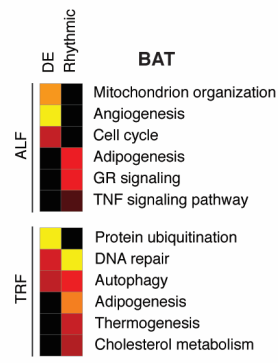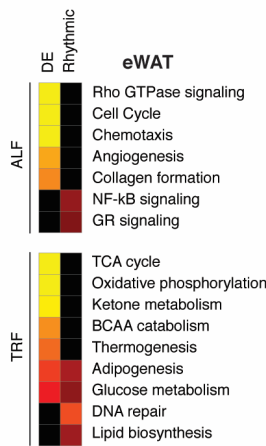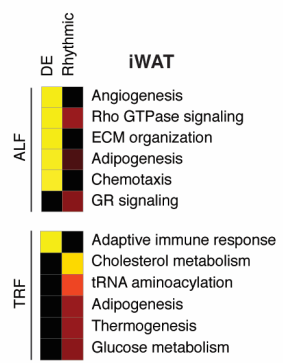



**Supplementary figure 6. Tissue-specific pathways changing in expression or rhythmicity upon TRF intervention. Related to Figures 2 and 4.** Heatmaps of tissue specific Metascape annotated pathways for genes upregulated or rhythmic in ALF or TRF are shown. Pathways significantly enriched by overrepresentation analysis (ORA) ( $P < 0.05$ ) and not already represented in Fig. 2D and Fig. 4C are indicated here. Insignificantly enriched pathways are represented in black.

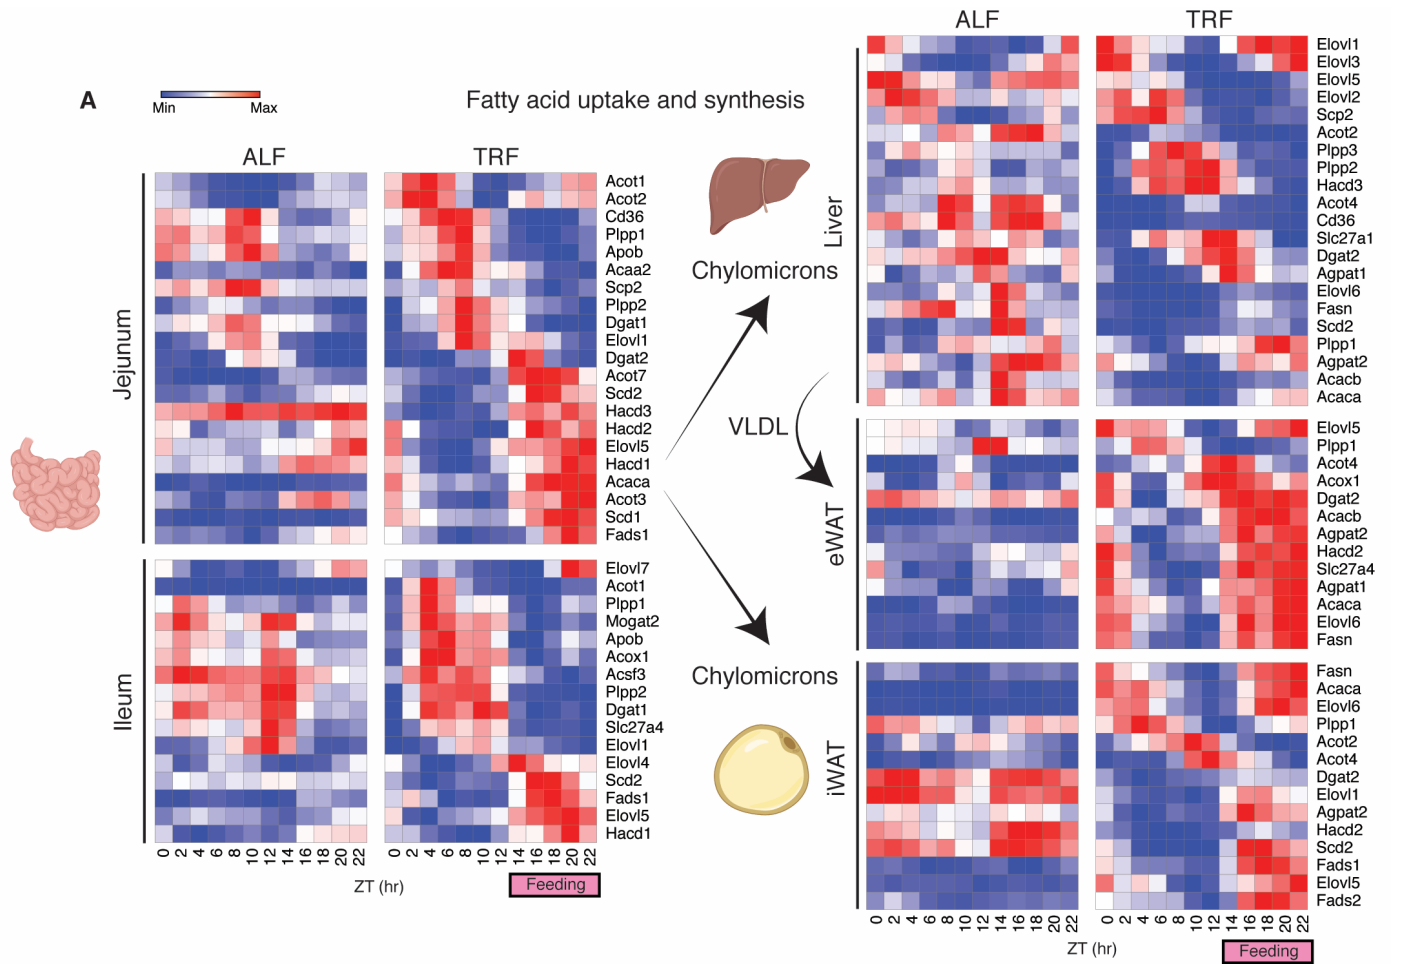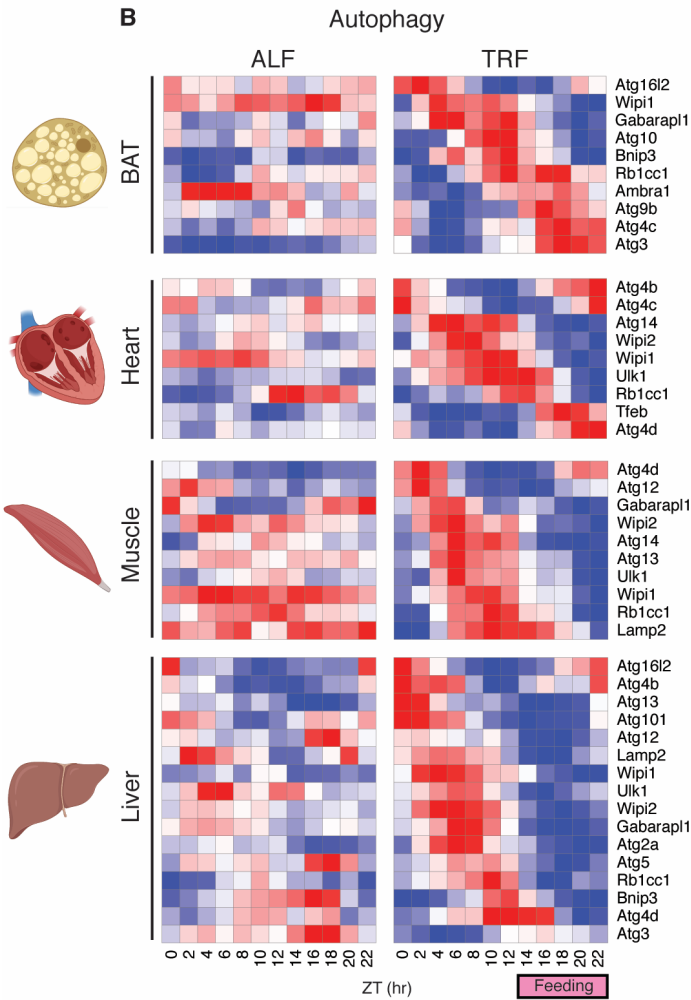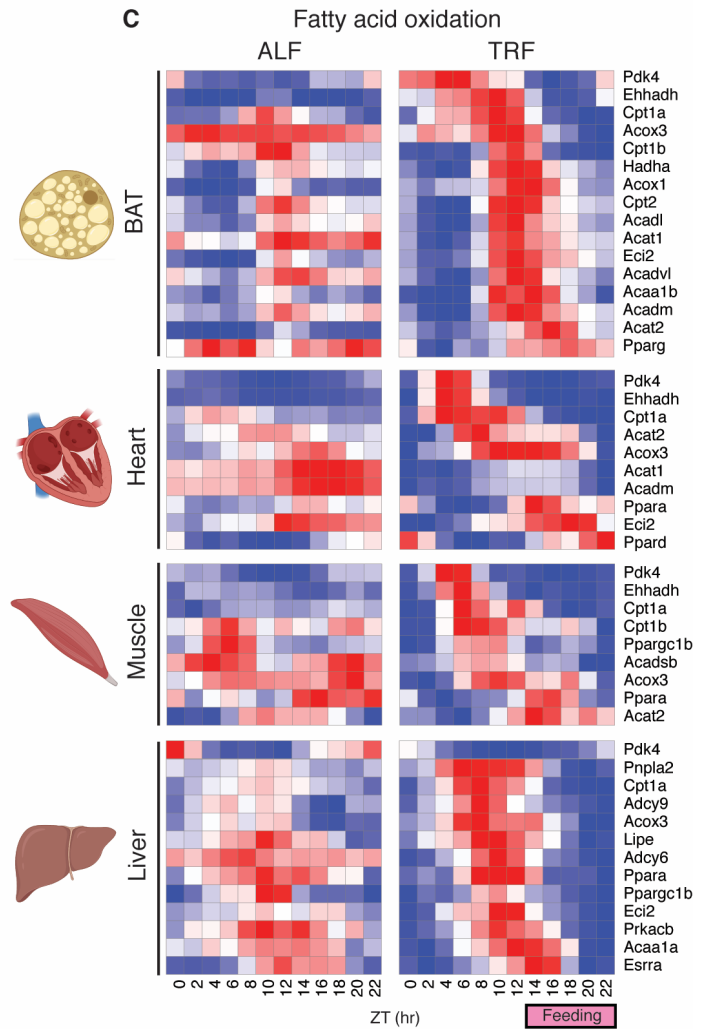

**Supplementary figure 7. TRF increases the expression and rhythmicity of genes involved in autophagy and fatty acid metabolism. Related to Figures 4 and 7.** (A-C) Heatmap of relative expression of genes involved in (A) Fatty acid uptake and synthesis, (B) Autophagy and (C) Fatty acid oxidation that are significantly cycling in TRF (FDR<0.05) in the indicated tissues and represented as a running average ( $k=2$ ) across 12 time points. The TRF feeding window from ZT13-ZT22 is indicated.
